# Supplementary material for: Barriers to publishing in biomedical journals perceived by a sample of French researchers: results of the DIAzePAM study
Source: Springer Nature journal article supplement (doi:10.1186/s12874-017-0371-z), 2017-07-10
Supplement: MOESM1 [file 13292294]

## **Additional file 1: English version of the DIAzePAM questionnaire.**

### **Q01. Over the last 2 years, how many times did you appear as...?**

*(more than 1 answer possible, only 1 per SQ)*

SQ001. 1st author in

- 0 article
- 1-2 articles
- 3-5 articles
- > 5 articles

SQ002. Last author in

- 0 article
- 1-2 articles
- 3-5 articles
- > 5 articles

SQ004. 2nd, 3rd or penultimate author in

- 0 article
- 1-2 articles
- 3-5 articles
- > 5 articles

SQ005. Other rank among authors

- 0 article
- 1-2 articles
- 3-5 articles
- > 5 articles

### **Q01a. How would you describe your perception concerning your publications?**

*(only 1 answer possible)*

- I publish enough
- I don't publish enough
- No answer

### **Q01b. Why?**

*(more than 1 answer possible)*

- I don't do enough research
- I'm not in a stimulating environment (no publishing or research activities in the department)
- I'm not a member of a research team
- I don't have time
- I don't need it
- I am not interested
- Other

### **Q02. What was your real writing contribution in the last 3 published article(s)?**

*(more than 1 answer possible)*

- Study design and development
- Data analysis and interpretation
- Writing the manuscript
- Critical review of the manuscript
- Approval of the final version of the manuscript
- Journal selection
- Manuscript submission to the journal
- Answers to reviewers, manuscript resubmission(s)
- Minimal
- Investigator (I included patients but did not contribute in manuscript writing)

### **Q03. According to you, what was the mean writing duration of this or these articles (from the beginning of the writing process to final acceptance by the journal)?**

*(only 1 answer possible)*

- 0 to 6 months
- 6 to 12 months
- 1 to 2 years

- 2 to 3 years
- > 3 years
- I don't know

**Q04. According to you, which parts were the most difficult to write?**

*(more than 1 answer possible)*

- Introduction
- Material and methods
- Results
- Tables and figures
- Discussion
- All
- Neither of them
- I don't know

**Q05. Did you call upon additional support, apart from authors, for writing one of these articles?**

*(only 1 answer possible)*

- Yes
- No

**Q05a. Support came from**

*(more than 1 answer possible)*

- One or more non-author colleague(s)
- English-speaking relationship(s)/translator(s)
- Medical writer(s)
- I don't know exactly

**Q05b. The person who helped was**

*(more than 1 answer possible)*

- Paid
- Unpaid
- Cited in the Acknowledgements section of the article
- Cited among authors
- None of this
- I don't know

**Q06. For your articles, what are your journal selection criteria?**

*(more than 1 answer possible)*

- Acceptance rate
- Impact Factor
- Publication speed
- Degree of specialization
- Topic already accepted by the journal
- High rank in SIGAPS classification of journals
- Open Access journal
- Acquaintance with of one of the editors
- Opportunity to suggest reviewers

**Q07. In general, which journal model do you prefer?**

*(only 1 answer possible)*

- Open access (free PDF of the article)
- Classic model (access to the article after subscription to the journal)
- No preference

**Q08. Which barriers do you encounter to publish your results?**

*(more than 1 answer possible)*

- Negative or unoriginal results
- Limited writing skills
- Difficulty starting writing
- Lack of time to write

- Complexity of instructions to authors
- Limited English skills
- Difficulty in coordinating with co-authors
- Lack of time to submit
- Limited submission skills
- Lack of funding (publication fees)
- Lack of funding (medical writer, translator)
- Response time of reviewers
- Lack of funding
- Other

**Q09. According to you, what are the main reasons for editor's refusal?**

*(more than 1 answer possible)*

- Lack of originality
- Problems of methodology and/or results
- Purely French origin (anglophone journal)
- Poor English quality
- Poor writing quality
- Erroneous or inappropriate comments by the reviewers chosen by the journal
- Poor choice of the journal (according to the article topic)
- Authors' conflicts of interest
- I don't know

**Q10. Would you accept technical support to overcome your difficulties in publishing?**

*(only 1 answer possible)*

- Yes
- No

**Q10b. If yes, for which tasks would you like support?**

*(type 0 no need, 1 possibly, 2 need, to 3 important need)*

SQ001. Writing some parts of the article

- 0: No need
- 1: Possibly
- 2: Need
- 3: Important need

SQ002. Tables and figures

- 0: No need
- 1: Possibly
- 2: Need
- 3: Important need

SQ003. English reediting

- 0: No need
- 1: Possibly
- 2: Need
- 3: Important need

SQ004. Critical reediting

- 0: No need
- 1: Possibly
- 2: Need
- 3: Important need

SQ005. Formatting before article submission

- 0: No need
- 1: Possibly
- 2: Need
- 3: Important need

SQ006. Management of co-authors comments

- 0: No need
- 1: Possibly
- 2: Need

3: Important need  
SQ007. Article submission

- 0: No need
- 1: Possibly
- 2: Need
- 3: Important need

SQ008. Writing responses to reviewers

- 0: No need
- 1: Possibly
- 2: Need
- 3: Important need

SQ009. Other

- 0: No need
- 1: Possibly
- 2: Need
- 3: Important need

**This support would enable you to**

**Q10d. Save time**

*(only 1 answer possible)*

- Yes
- No
- No answer

**Q10e. If yes**

*(only 1 answer possible)*

- 0-3 months
- 3-6 months
- 6-9 months
- 9-12 months
- > 12 months

**Q10f. Increase high impact factor journal submission**

*(only 1 answer possible)*

- Yes
- No
- No answer

**Q10g. Avoid some refusals**

*(only 1 answer possible)*

- Yes
- No
- No answer

**Q11. For your forthcoming article, do you need (or do you think needing) funding support for...?**

*(more than 1 answer possible)*

- Medical writing
- Translation or English reedition
- Publication fee
- Open Access fee
- No need

**Q12. According to you, how could this support be funded?**

*(more than 1 answer possible)*

- Research project budget (upstream inclusion) in response to a call
- AP-HP
- Financial value of SIGAPS/MERRI points
- Pharmaceutical company
- Other

**Q13. Why do you want to publish ?**

*(more than 1 answer possible)*

- Primacy of novelty (SQ001)
- Educational role (SQ002)
- Changes in practice (SQ003)
- Keeping an official record of study results (SQ004)
- Peer recognition / reputation (SQ005)
- Career advancement (SQ006)
- Financial interest (SIGAPS/MERRI) (SQ007)
- Pressure from medical hierarchy (SQ008)
- Information dissemination (SQ009)
- Confirming previous studies (SQ010)
- Pressure from institutional hierarchy (AP-HP, university...) (SQ011)

**Q14a. Sex**

*(only 1 answer possible)*

- Male
- Female

**Q14b. Age (years)**

*(only 1 answer possible)*

- < 35
- 35-45
- 45-55
- 55-65
- > 65

**Q14c. Profession**

*(only 1 answer possible)*

- Physician
- Pharmacist
- Odontologist
- Biologist
- Geneticist
- Other

**Q14d. Position**

*(only 1 answer possible)*

- Hospital practitioner
- Senior registrar, hospital university assistant
- University professor/hospital practitioner
- University assistant professor/hospital practitioner
- Other

**Q14e. Do you hold the following degrees?**

*(more than 1 answer possible)*

- PhD
- Accreditation to direct research
- Neither of the two

**Q15. Do you want to add a comment?**

*(free)*
